# Supplementary material
Source: PubMed Central journal article supplement (PMC3504655)
Supplement: NIHMS419922-supplement-Supplemental_data.pdf [file NIHMS419922-supplement-Supplemental_data.pdf]

Supplemental Data

Supplemental Table 2

| Day Post Infection   | Exp. 1 | Exp. 2 | Exp. 3 | Exp. 4 | Exp. 5 |
|----------------------|--------|--------|--------|--------|--------|
| # of mice            | N=4    | N=3    | N=4    | N=5    | N=2    |
| Anti-CD3             | 1.16   | 1.14   | 0.52   | 1.33   | 0.91   |
|                      |        |        |        |        |        |
| E646-660             | ND     | 0.32   | ND     | 0.29   | 0.16   |
| <b>E641-655</b>      | 0.51   | 0.33   | 0.10   | 0.41   | 0.27   |
|                      |        |        |        |        |        |
| <b>NS3 1616-1630</b> | 0.32   | 0.50   | 0.15   | 0.30   | 0.14   |
| 1617-1627            | ND     | 0.11   | ND     | ND     | 0.08   |
| 1618-1628            | ND     | 0.10   | ND     | 0.17   | 0.08   |
| 1619-1629            | ND     | 0.15   | ND     | 0.28   | 0.37   |
| 1620-1630            | ND     | 0.16   | ND     | ND     | ND     |
|                      |        |        |        |        |        |
| <b>NS3 2066-2080</b> | 0.53   | 0.41   | 0.41   | 0.49   | 0.43   |
| 2068-2078            | ND     | 0.25   | ND     | 0.24   | ND     |
| 2070-2080            | ND     | 0.20   | 0.01   | 0.34   | 0.08   |

**Supplemental Table 2. List of truncated CD4 T cell peptides.** This table lists the truncated CD4 T cell peptides used to determine the optimal epitope. The optimal epitope is shown in bold. Responses were determined by ICCS for IFN $\gamma$  production by splenocytes on day 7 post infection, as described in methods, and are represented as in Table 1. ND-not determined

Supplemental Figure 1

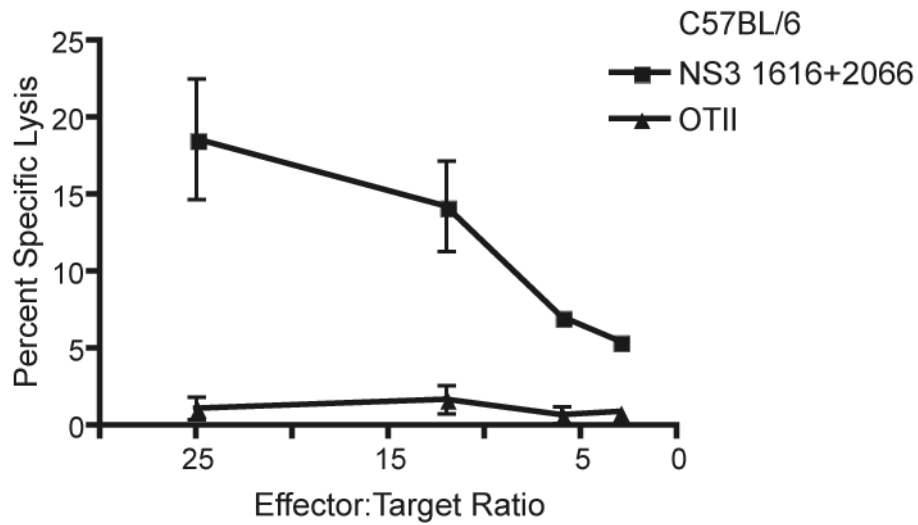

**Supplemental Figure 1. Direct *ex vivo* cytotoxicity of peptide pulsed targets by purified CD4 T cells.** A. Purified CD4 T cells were immediately used in a 6-hour  $^{51}\text{Cr}$  release assay with peptide-pulsed target cells (IC21). IC21 cells were peptide pulsed (10-6M) with either a combination of NS3 1616+ NS32066 or OTII control peptide. Results represent the average of 4 mice, and are representative of two independent experiments.

## Supplemental methods

CD4<sup>+</sup> T cells were isolated from spleens of B6 mice 7 days post-infection with WNV, by negative selection using anti-CD8, B220, NK1.1-coated beads (Miltenyi Biotec). CD4<sup>+</sup> T cells were isolated at 80-95% purity. Direct ex vivo CTL activity was determined using radioactively labeled peptide-coated IC21 cells as targets.  $1 \times 10^5$  IC21 cells ( $1 \times 10^4$  cells per well) were pulsed with <sup>51</sup>CR and peptide overnight in a 96 well plate. Cells were washed 3 times with warm media (5% FBS + RPMI) and purified CD4 T cells were serially diluted, then placed into the 96 well plate at indicated effector to target ratio for six hours. After six hours 30 $\mu$ l of supernatant was removed and added to a lumaplate (Packard Co). Radioactivity was measured using TopCount Packard  $\delta/\gamma$  radioactivity reader (Packard Co). Percent specific lysis was calculated as  $[(E - S)/(M - S)] \times 100$ , where E equals the counts per minute released from targets incubated with lymphocytes, S equals the counts per minute released from target cells incubated with no lymphocytes and M equals the counts per minute released from cells after lysis with 1% Nonidet P40 (USB).
